# Supplementary material for: Ion-pair separation via selective inclusion/segregation processes
Source: Royal Society of Chemistry journal article supplement (doi:10.1039/b904811c), 2009-01-01
Supplement: b904811c.pdf [file b904811c.pdf]

## Ion-pair separation *via* selective inclusion/segregation processes

**Giuseppe Gattuso,<sup>a</sup> Anna Notti,<sup>a</sup> Sebastiano Pappalardo,<sup>b</sup> Melchiorre F. Parisi,<sup>\*a</sup> Tullio Pilati,<sup>c</sup> Giuseppe Resnati<sup>\*d</sup> and Giancarlo Terraneo<sup>d</sup>**

<sup>a</sup> *Dipartimento di Chimica Organica e Biologica, Università di Messina, Salita Sperone 31, 98166 Messina, Italy. Fax: +39 090 393895; E-mail: [mparisi@unime.it](mailto:mparisi@unime.it)*

<sup>b</sup> *Dipartimento di Scienze Chimiche, Università di Catania, Viale A. Doria 6, 95125 Catania, Italy.*  
<sup>c</sup> *ISTM-CNR, University of Milan, 20133, Milan, Italy*

<sup>d</sup> *NFMLab—DCMIC “G. Natta”, Politecnico di Milano, 7, via Mancinelli, 20131, Milan, Italy.*  
*Fax: +39 02 2399 3080; E-mail: [giuseppe.resnati@polimi.it](mailto:giuseppe.resnati@polimi.it)*

**Electronic Supplementary Information**

## Experimental

*General.* Melting points were determined on a Kofler melting point apparatus and are uncorrected. Unless otherwise stated,  $^1\text{H}$  (300 MHz),  $^{19}\text{F}$  (282 MHz), and  $^{13}\text{C}$  (75 MHz) NMR spectra were obtained at 25 °C in  $\text{CDCl}_3$  (using TMS and  $\text{CFCl}_3$  as internal standards). ESI mass spectra were acquired on a Mariner ESI-TOF instrument using  $\text{CHCl}_3/\text{MeOH}$  2:1 v/v (positive ion mode). All solvents and chemicals were reagent grade and were used without further purification. Calix[5]arene **2** was prepared according to a literature procedure.<sup>1</sup> *n*-Butylammonium iodide was obtained by adding aqueous hydroiodic (57 wt. %, 1 eq.) to a methanolic solution of *n*-butylamine; subsequent evaporation of the solvents, and final precipitation of the residue formed from  $\text{CH}_3\text{OH}/\text{Et}_2\text{O}$ .

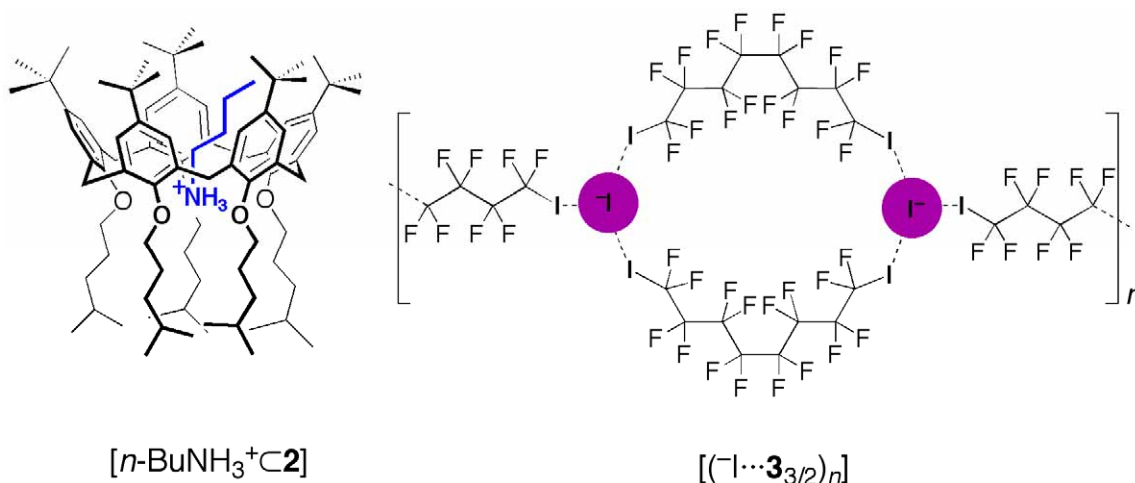

*Formation and Characterization of “Supramolecular Salt” 1.* Solid calix[5]arene **2** (37.0 mg; 0.030 mmol) was added to a solution of  $n\text{-BuNH}_3^+\text{I}^-$  (6.0 mg, 0.030 mmol) and 1,8-diodoperfluorooctane **3** (29.4 mg, 0.045 mmol) in  $\text{CH}_2\text{Cl}_2$  (2 mL). The mixture was stirred for a few minutes at r.t., and then evaporated to dryness. The solid residue was dissolved in toluene (5 mL) and the solution, placed into a vial, and left to slowly (*ca.* 60 days) evaporate inside a sealed chamber containing vaseline. **1** was isolated as off-white crystals, mp 235–236 °C (dec.).  $^1\text{H}$  NMR<sup>2,3</sup>  $\delta$  –1.95 to –1.84 (m,  $\beta\text{-CH}_2$ , 2 H),\* –1.19 to –1.06 (br m,  $\alpha\text{-CH}_2$ , 2 H),\* –0.81 to –0.68 (m,  $\gamma\text{-CH}_2$ , 2H),\* –0.38 (t,  $J$  = 7.2 Hz,  $\text{CH}_3$ , 3H),\* 0.95 (d,  $J$  = 6.7 Hz,  $\text{CH}(\text{CH}_3)_2$ , 30 H), 1.14 (s,  $\text{C}(\text{CH}_3)_3$ , 45 H), 1.20–1.36 (m,  $\text{OCH}_2\text{CH}_2\text{CH}_2$ , 10 H), 1.60 (sept,  $J$  = 6.7 Hz,  $\text{CH}(\text{CH}_3)_2$ , 5 H), 1.96–2.06 (m,  $\text{OCH}_2\text{CH}_2\text{CH}_2$ , 10 H),

<sup>1</sup> F. Arnaud-Neu, S. Fuangwasdi, A. Notti, S. Pappalardo and M. F. Parisi, *Angew. Chem. Int. Ed.*, 1998, **37**, 112.

<sup>2</sup> In addition to the peaks of the  $n\text{-BuNH}_3^+\cdot\mathbf{2}$  complex, reported above, the spectrum shows a set of low intensity peaks consistent with the presence of about 5% of uncomplexed host and guest.

<sup>3</sup> Resonances referring to the *endo*-cavity-included *n*-butylammonium ion guest are designated with an asterisk.

3.44 and 4.38 (AX,  $J = 13.4$  Hz, ArCH<sub>2</sub>Ar, 10 H), 4.00 (t,  $J = 8.3$  Hz, OCH<sub>2</sub>CH<sub>2</sub>CH<sub>2</sub>, 10 H), 5.57 (br s, NH<sub>3</sub><sup>+</sup>, 3H),\* and 7.19 (s, ArH, 10 H) ppm; <sup>13</sup>C NMR<sup>3</sup>  $\delta$  13.5 (q),\* 18.8 (t),\* 22.6 (q), 27.2 (t),\* 27.88 (d), 27.92 (t), 29.0 (t), 31.1 (q), 34.2 (s), 34.4 (t), 37.8 (t),\* 76.4 (t), 94.4 (tt,  $J = 320.8$ , 42.0 Hz, CF<sub>2</sub>I), 104.7–114.6 (m, CF<sub>2</sub>), 126.8 (d), 133.0 (s), 133.0 (s), 148.0 (s) and 150.5 (s) ppm. <sup>19</sup>F NMR –122.39 to –122.10 (m, CF<sub>2</sub>CF<sub>2</sub>CF<sub>2</sub>CF<sub>2</sub>I, 4F), –121.58 to –121.30 (m, CF<sub>2</sub>CF<sub>2</sub>CF<sub>2</sub>CF<sub>2</sub>I, 4F), –113.95 to –113.80 (m, CF<sub>2</sub>CF<sub>2</sub>CF<sub>2</sub>CF<sub>2</sub>I, 4F), and –62.26 (t,  $J = 15.0$  Hz, CF<sub>2</sub>CF<sub>2</sub>CF<sub>2</sub>CF<sub>2</sub>I, 4F) ppm. ESI-MS  $m/z$  [2·NH<sub>4</sub>]<sup>+</sup> 1249.6, [2·K]<sup>+</sup> 1270.6, and [2·*n*-BuNH<sub>3</sub>]<sup>+</sup> 1304.7.

<sup>19</sup>F NMR Studies. Upon addition of 1.5 equiv. of 1,8-diodoperfluorooctane **3** to a 50 mM CDCl<sub>3</sub> solution of [*n*-BuNH<sub>3</sub><sup>+</sup>·**2**]<sup>+</sup>I<sup>–</sup> (previously obtained, by solvent removal, from a solution (CDCl<sub>3</sub>/CD<sub>3</sub>OD, 9:1) of equimolar amounts of **2** and *n*-BuNH<sub>3</sub><sup>+</sup>I<sup>–</sup>) the resonance of the –CF<sub>2</sub>I group of **3** undergoes an upfield induced shift  $\Delta\delta = 2.76$  ppm ( $\Delta\delta = \delta_3 - \delta_{\{3 + [n\text{-BuNH}_3^+\cdot\mathbf{2}]\}^-}$ ), fully consistent with halogen bonding formation.<sup>4</sup>

*Crystal Structure Determination.* Data were collected at 123(2) K on a Bruker APEX CCD area detector diffractometer, equipped with an OXFORD low temperature device, using MoK $\alpha$  radiation ( $\lambda = 0.71073$  Å), graphite monochromator;  $\omega$  and  $\varphi$  scans. Data collection and data reduction were performed by SMART and SAINT, absorption correction, based on multi-scan procedure, by SADABS.<sup>5</sup> The structure was solved by SIR2002,<sup>6</sup> and refined on all independent reflections by full-matrix least-squares based on  $F_o^2$  by using SHELXL-97<sup>7</sup>. H atoms were riding in calculated positions, 1301 refined parameters. CCDC 698062 contains the supplementary crystallographic data for this paper. These data can be obtained free of charge from The Cambridge Crystallographic Data Centre via [www.ccdc.cam.ac.uk/data\\_request/cif](http://www.ccdc.cam.ac.uk/data_request/cif).

<sup>4</sup> P. Metrangolo, W. Panzeri, F. Recupero and G. Resnati, *J. Fluorine Chem.*, 2002, **114**, 27.

<sup>5</sup> Bruker, SMART, SAINT and SADABS. Bruker AXS Inc., Madison, Wisconsin, USA, 1999.

<sup>6</sup> M. C. Burla, M. Camalli, B. Carrozzini, G. L. Casciarano, C. Giacovazzo, G. Polidori and R. Spagna, *J. Appl. Crystallogr.*, 2003, **36**, 1103.

<sup>7</sup> G. M. Sheldrick, SHELXL-97. Program for the Refinement of Crystal Structures. University of Göttingen, Germany, 1997.

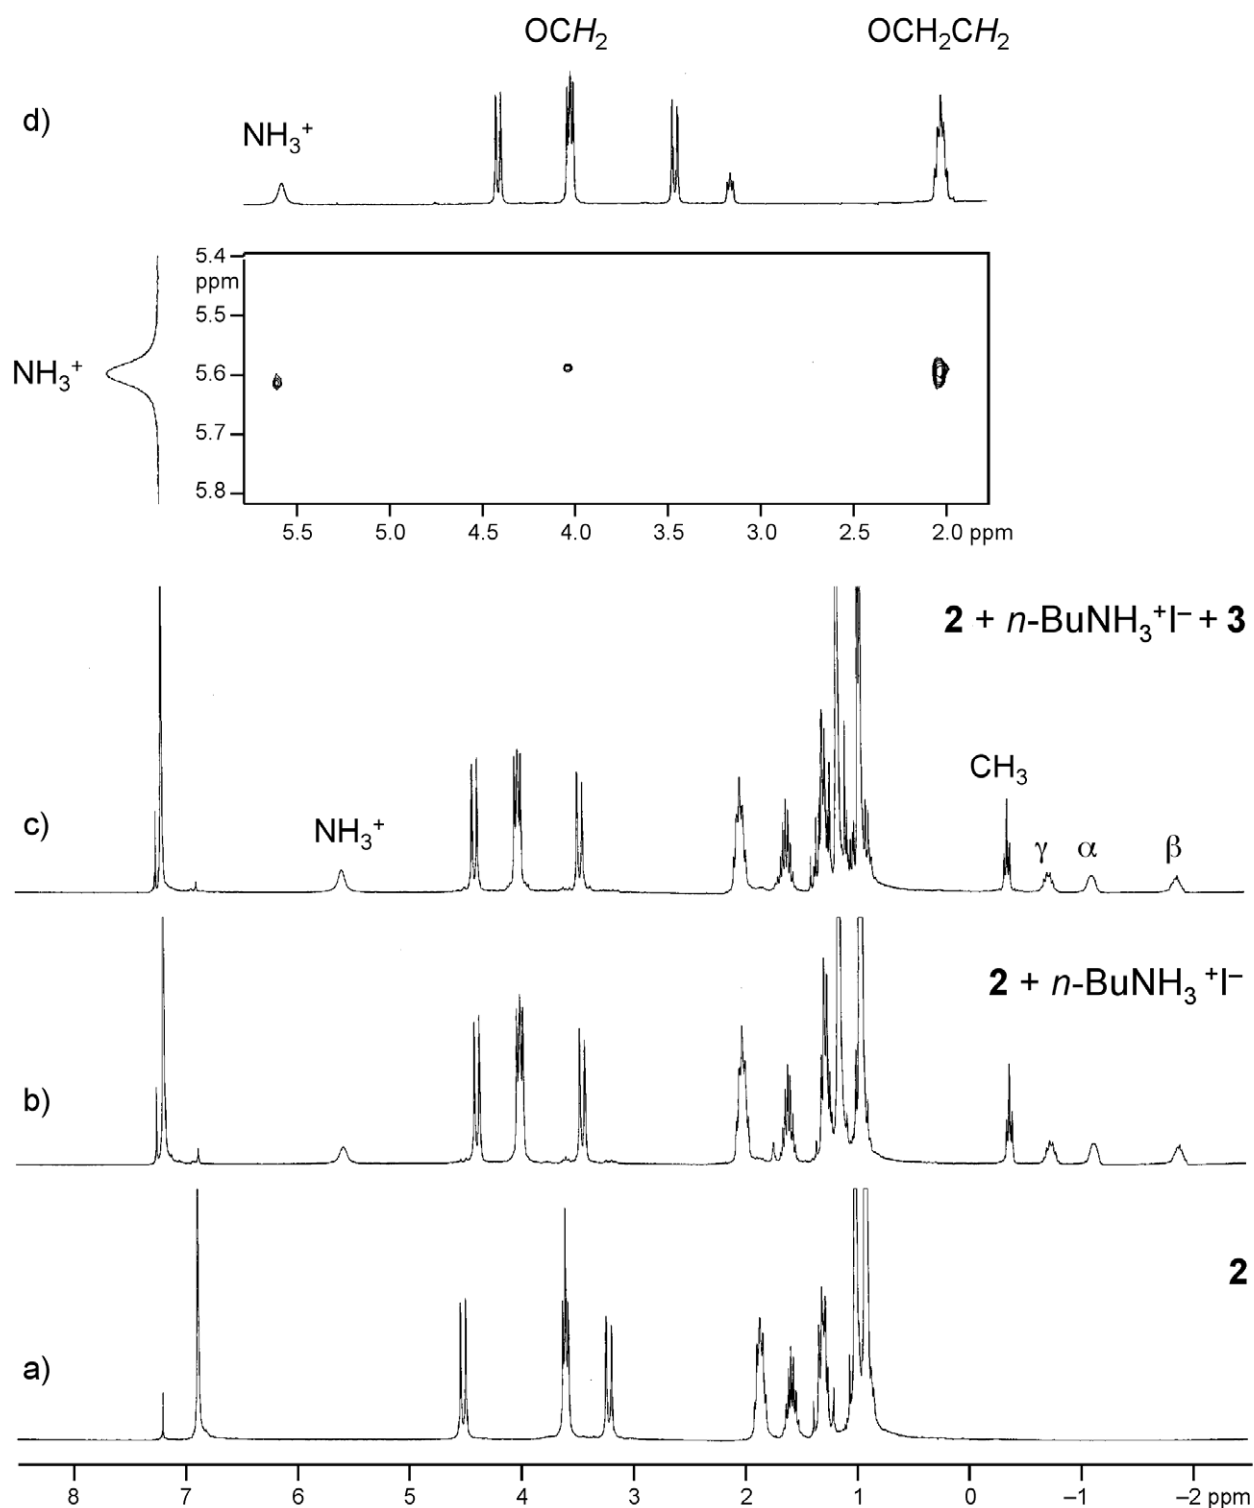

**Fig. S1**  $^1\text{H}$  NMR spectra (300 MHz,  $\text{CDCl}_3$ , 295 K) of: a) **[2]** = 50 mM; b) **[2]** =  $[n\text{-BuNH}_3^+\text{I}^-]$  = 50 mM; c) **[2]** =  $[n\text{-BuNH}_3^+\text{I}^-]$  = 50 mM and **[3]** = 75 mM; and d) section of the TROESY (500 MHz,  $\text{CDCl}_3$ ) spectrum of  $n\text{-BuNH}_3^+\text{C}2$ , obtained from **[2]** and  $[n\text{-BuNH}_3^+\text{I}^-]$  50 and 75 mM, respectively.

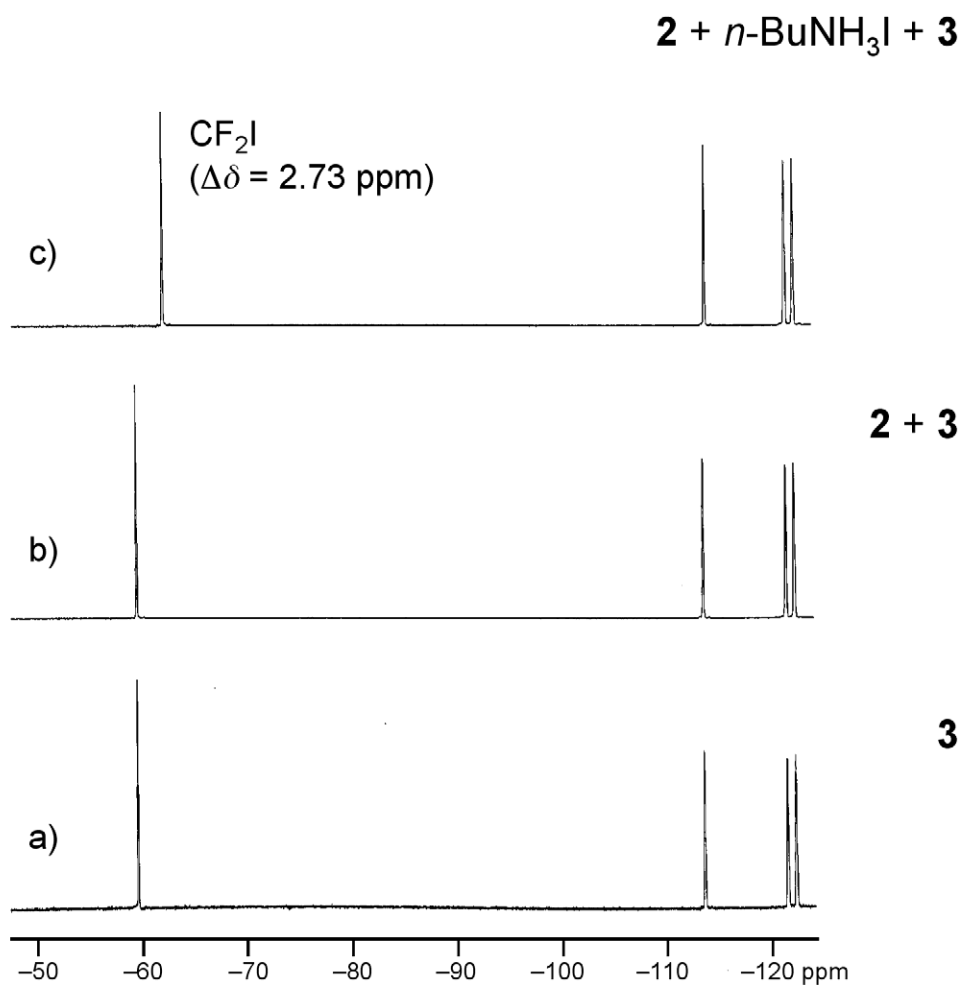

**Fig. S2** <sup>19</sup>F NMR spectra (282 MHz, CDCl<sub>3</sub>, 295 K) of: a) [3] = 75 mM; b) [2] = 50 mM and [3] = 75 mM; c) [2] = [*n*-BuNH<sub>3</sub><sup>+</sup>I<sup>-</sup>] = 50 mM and [3] = 75 mM.

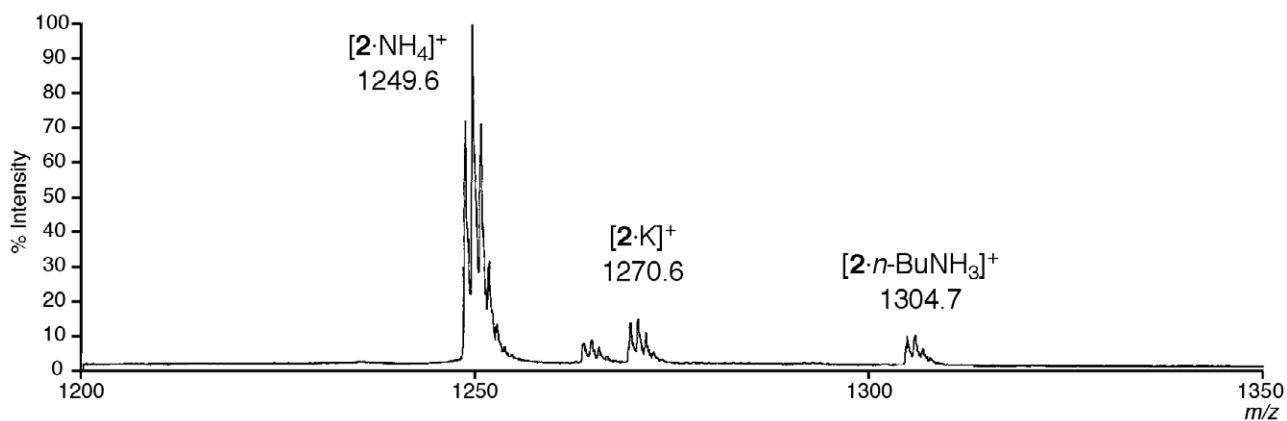

**Fig. S3** ESI-MS spectrum (positive ion mode) of the 'supramolecular salt' **1**.
